# Supplementary material for: Vitamin D deficiency and its characteristics among patients with acute stroke at a national referral hospital in Kampala Uganda
Source: Springer Nature journal article supplement (doi:10.1186/s12902-015-0053-y), 2015-10-05
Supplement: MOESM1 [file 9753956]

**Vitamin D deficiency and its characteristics among patients with acute stroke at a national referral hospital in Kampala Uganda MS: 8181168691274465**

Appendix1: Data Collection form

Study number

5 **1 Sociodemographics**

|                      |           |             |              |            |
|----------------------|-----------|-------------|--------------|------------|
| <b>1. Age</b>        |           | <b>DOB</b>  |              |            |
| <b>2. Sex</b>        |           |             | 1 female     | 2 male     |
| <b>3. Residence</b>  | 1Urban    | 2Periurban  | 3Rural       |            |
| <b>4. Religion</b>   | 1Catholic | 2Protestant | 3.Moslem     | 4.Other    |
| <b>5. Tribe</b>      |           |             |              |            |
| <b>6. Occupation</b> |           |             |              |            |
| <b>7. Education</b>  | 1.None    | 2. Primary  | 3. Secondary | 4.Tertiary |
| <b>8. Onset Date</b> |           |             |              |            |

**2. Stroke Diagnosis**

**2.1 Stroke symptoms (Tick all that apply)**

|                   |                         |                   |
|-------------------|-------------------------|-------------------|
| 1.Limb weakness   | 4.Reduced consciousness | 7. Other(specify) |
| 2.Facial weakness | 5.Dizziness             |                   |
| 3.Altered speech  | 6.Abnormal movements    |                   |

10 **2.2 Stroke Signs (Tick all that apply)**

|                              |             |             |            |            |
|------------------------------|-------------|-------------|------------|------------|
| 1. Limb weakness             | Right upper | Right lower | Left upper | Left lower |
| 2. Facial weakness           |             |             |            |            |
| 3. Other Cranial nerve palsy |             |             |            |            |
| 4. Abnormal                  |             |             |            |            |
| 5. Abnormal tone             |             |             |            |            |
| 6. GCS score                 | E           | V           | M          | Total      |
| Other (specify)              |             |             |            |            |

**Imaging**

|                 |            |               |
|-----------------|------------|---------------|
| Brain CT done   | 1.Yes      | 2.No          |
| If yes, subtype | 1.Ischemic | 2.Hemorrhagic |

**3. Previous Medical history conditions**

|                 |  |            |            |
|-----------------|--|------------|------------|
| Hypertension    |  | 1 yes      | 2. no      |
| Diabetes        |  | 1 yes      | 2.no       |
| HIV             |  | 1 Positive | 2 negative |
| Other (specify) |  |            |            |

15 **4. Drug history**

|                        |                  |       |
|------------------------|------------------|-------|
| Antiretroviral therapy | 1. Yes (specify) | 2. No |
| Azole Antifungal       | 1. Yes (specify) | 2. No |
| Anticonvulsants        | 1. Yes (specify) | 2. No |
| Corticosteroids        | 1. Yes (specify) | 2. No |
| Other (specify)        |                  |       |

**5. Lifestyle measures**

How many days a week do you walk for  $\geq 30$  minutes?

|  |  |  |
|--|--|--|
|  |  |  |
|--|--|--|

20 **6. On a typical day, how much time (minutes) do you spend outdoors**

|          |  |
|----------|--|
| 6am-10am |  |
| 10am-4pm |  |
| 4pm-7pm  |  |

**7. Mode of dress on a typical day.**

|  |
|--|
|  |
|--|

**8. Physical examination**

|                          |  |
|--------------------------|--|
| Weight (kg)              |  |
| Height/length (m)        |  |
| Waist circumference (cm) |  |
| Hip circumference (cm)   |  |
| Pulse rhythm             |  |
| Blood pressure mmHg      |  |

25

**9. Lab measurements**

|                   |  |                   |  |
|-------------------|--|-------------------|--|
| 25hydroxy-vitamin |  | Total cholesterol |  |
| RBG               |  | HDL               |  |
| Serum albumin     |  | LDL               |  |
| Serum calcium     |  | Non HDL           |  |
| Serum creatinine  |  | HIV screen        |  |

**Interviewed By**

**Date of interview**
